# Supplementary material for: Olfactory stimulation with multiple odorants prevents stress-induced cognitive and psychological alterations
Source: PubMed Central journal article supplement (PMC11574619; doi:10.1093/braincomms/fcae390), 2024-11-05
Supplement: fcae390_supplementary_data.pdf [file fcae390_supplementary_data.pdf]

## Supplementary Materials

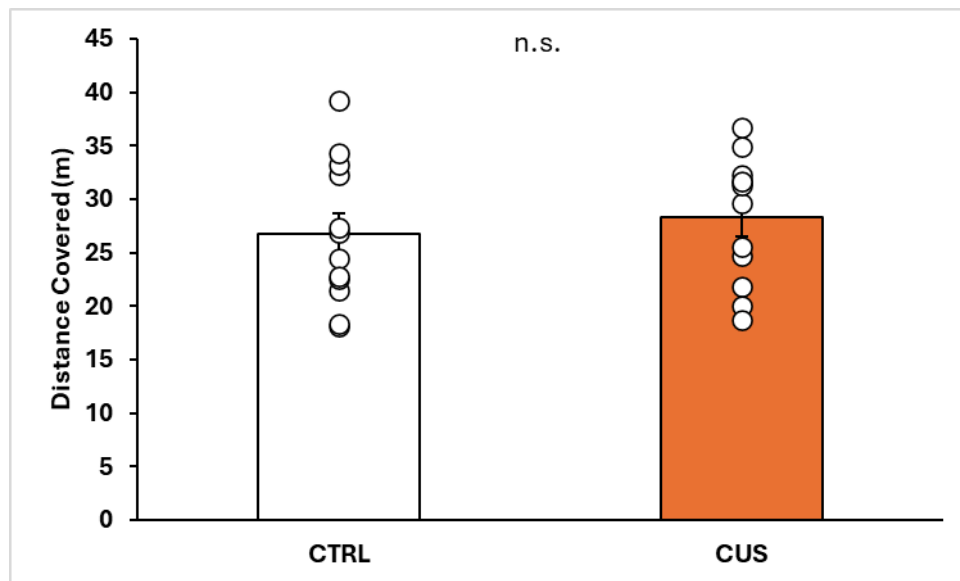

**Supplementary Figure 1. Evaluation of locomotor activity in control mice and CUS-exposed mice.** No differences were observed in locomotor activity between control mice and CUS-exposed mice (n=12 each condition). Student's *t* test. Each dot represents one animal sample. All data are reported as mean  $\pm$  s.e.m. n.s. not significant.

**Uncropped gels: samples beyond the white squares are unrelated to the experiment.**

**Figure 1**

WB ventral hippocampus

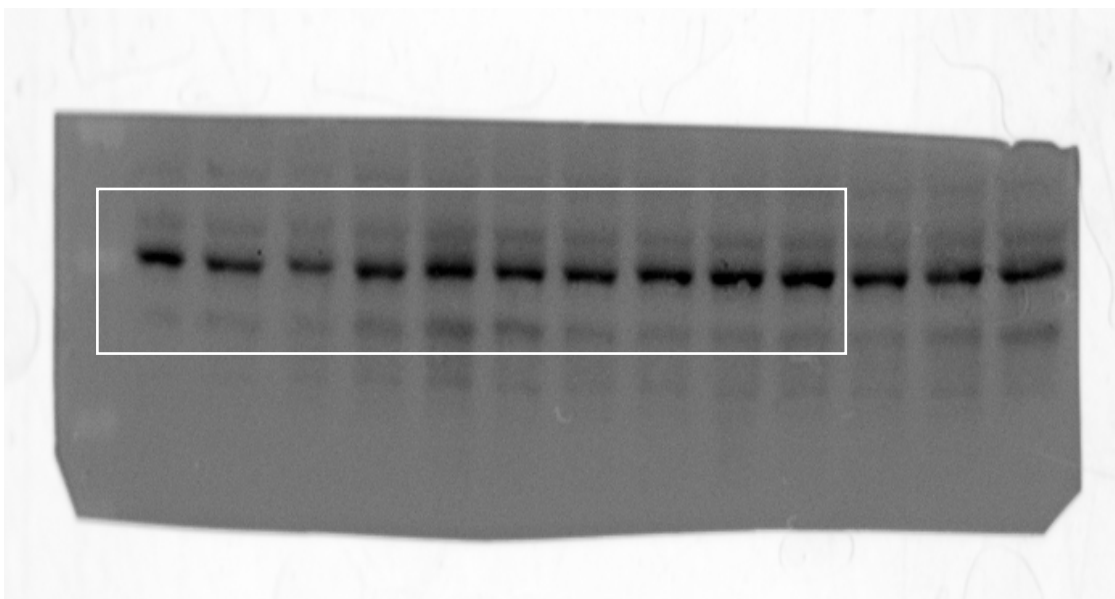

pERK

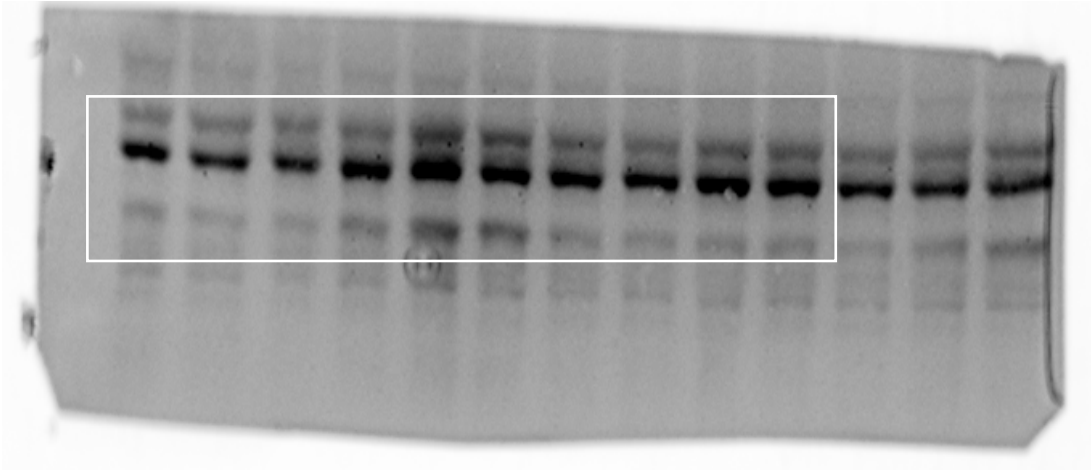

ERK

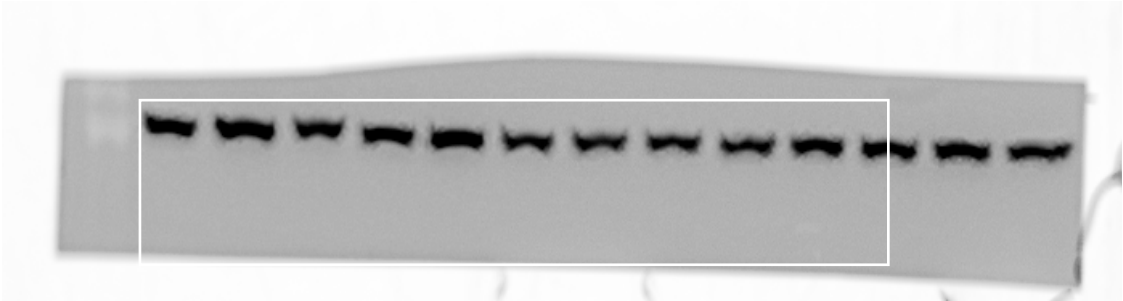

Hsp90

WB prefrontal cortex

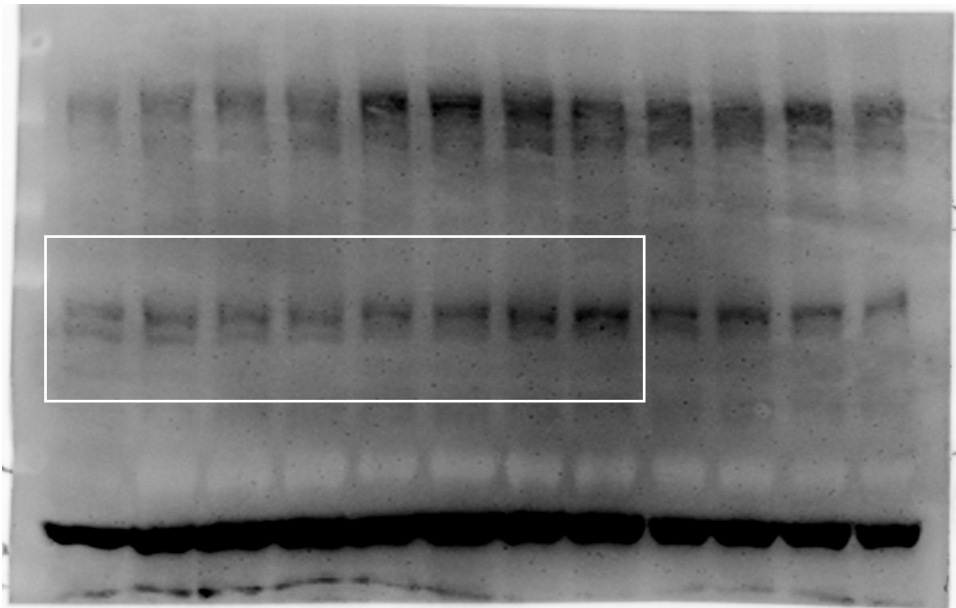

pNf-kB

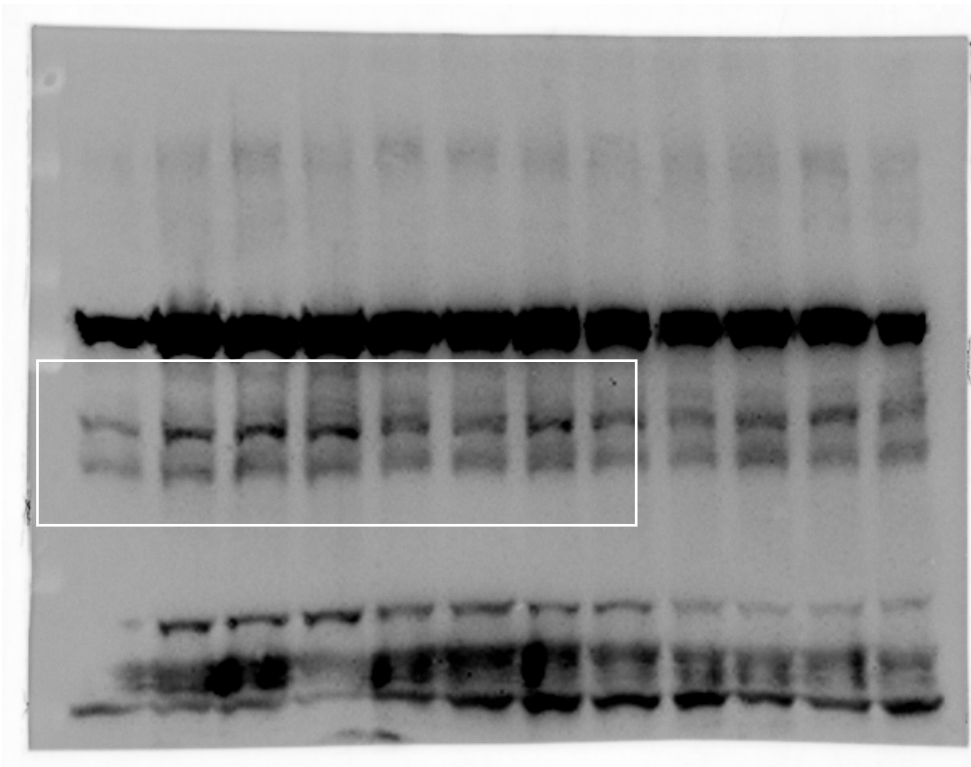

Nf-kB

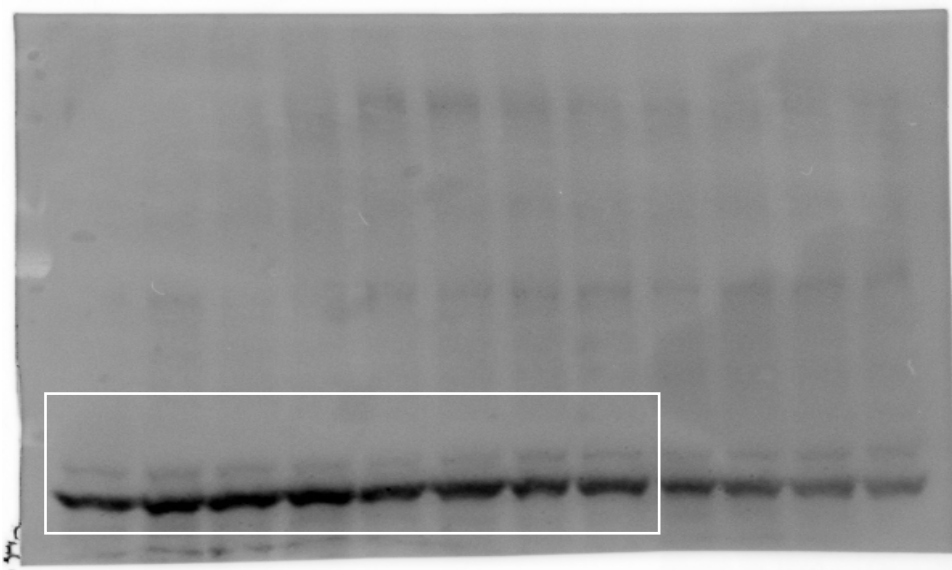

pERK

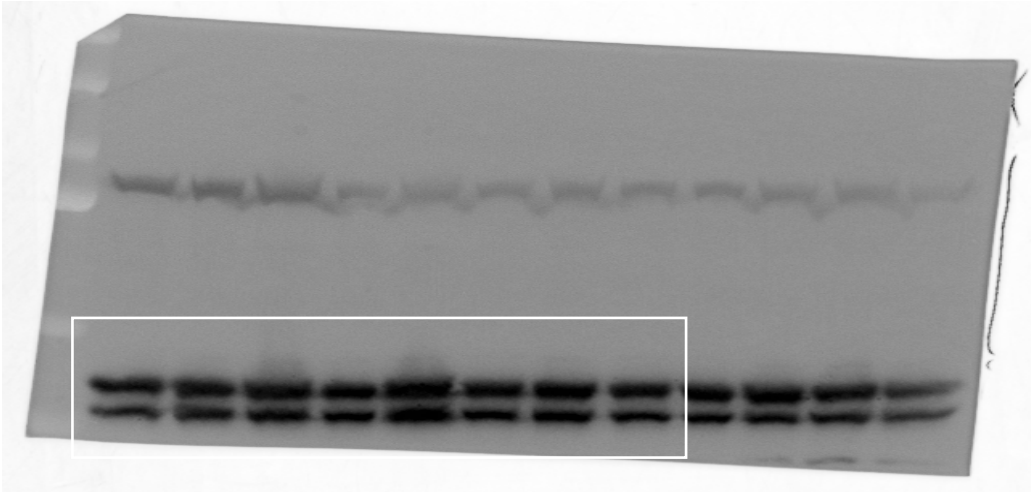

ERK

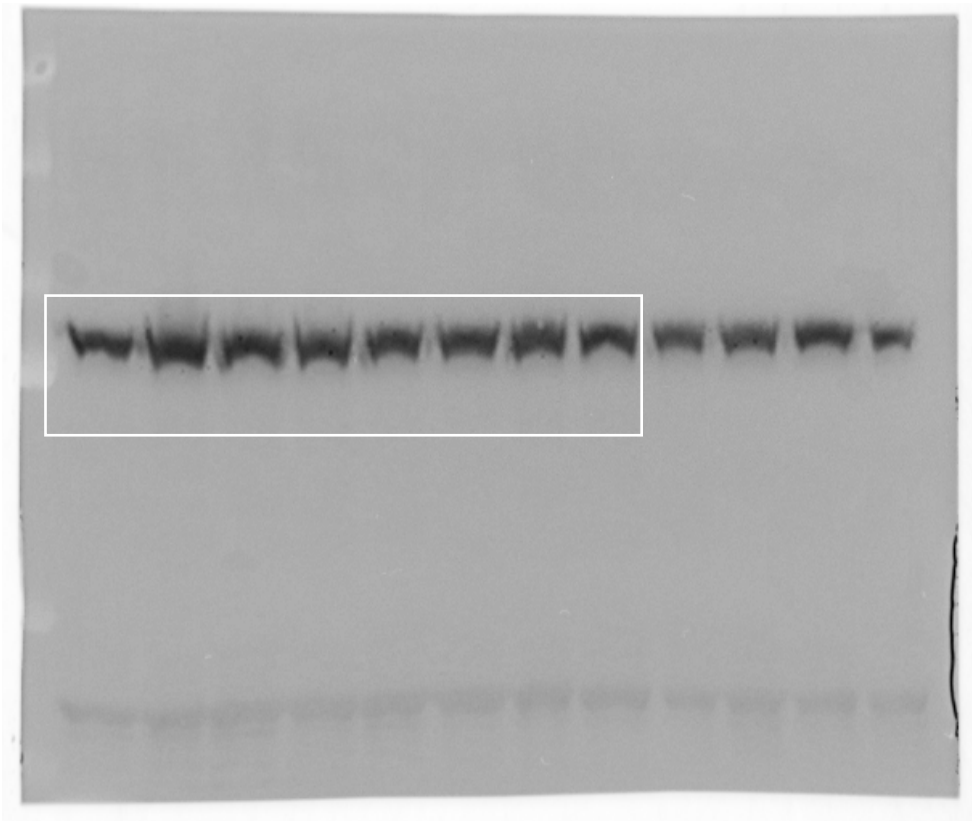

Hsp90

Figure 5

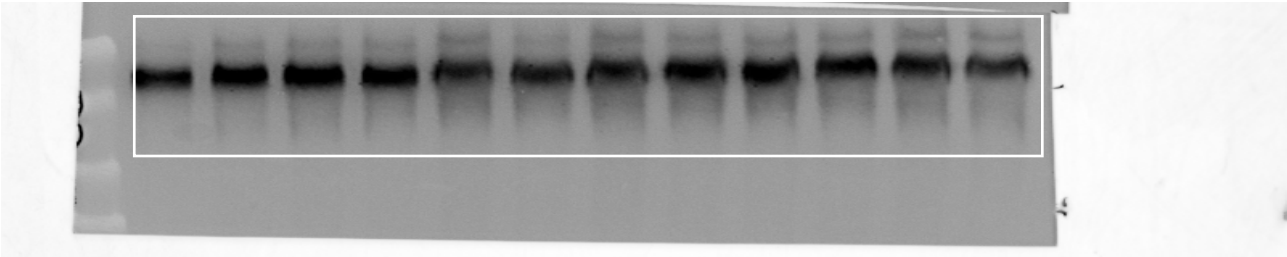

PSD-95

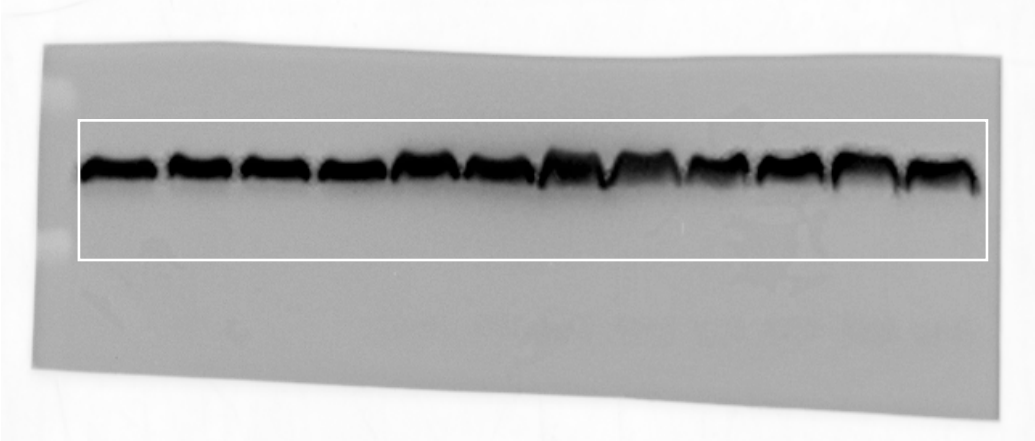

Actin

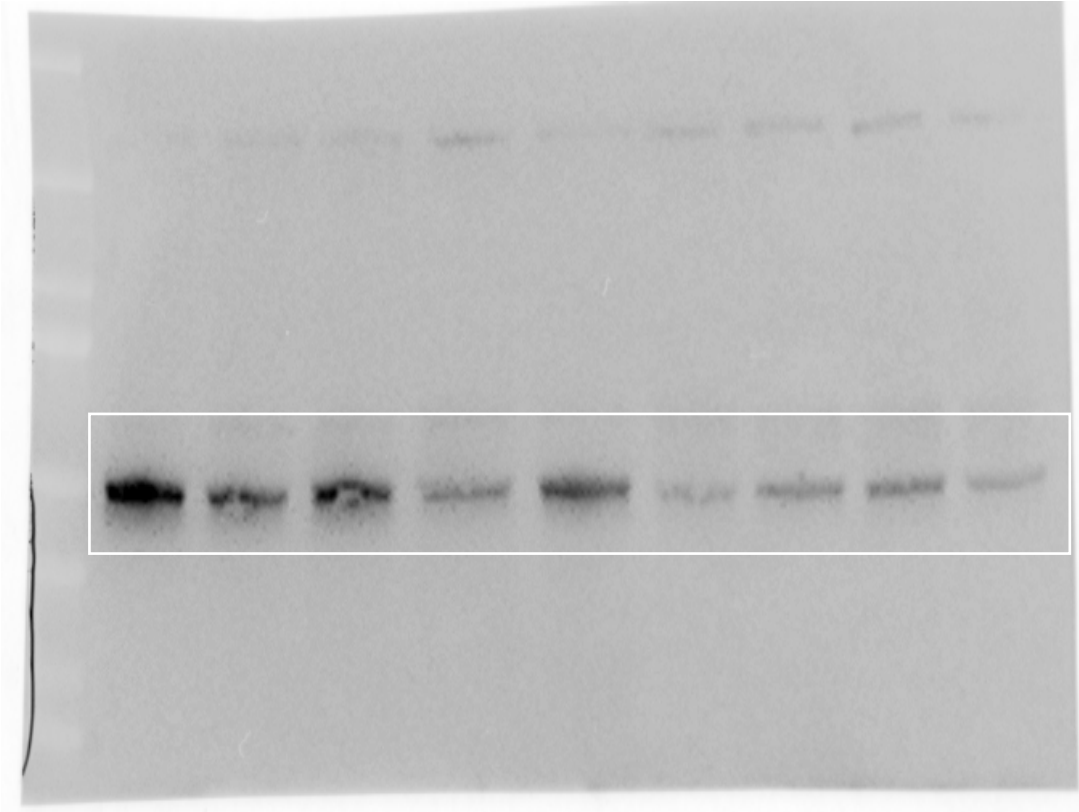

pGSK3β

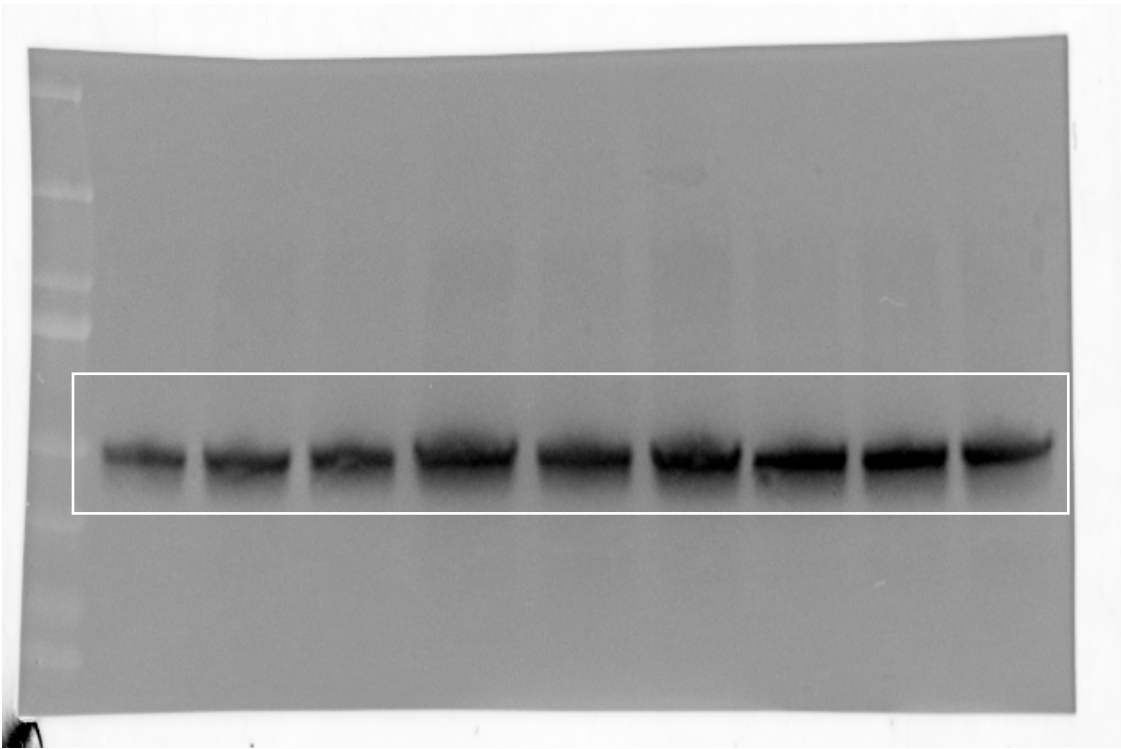

GSK3 $\beta$

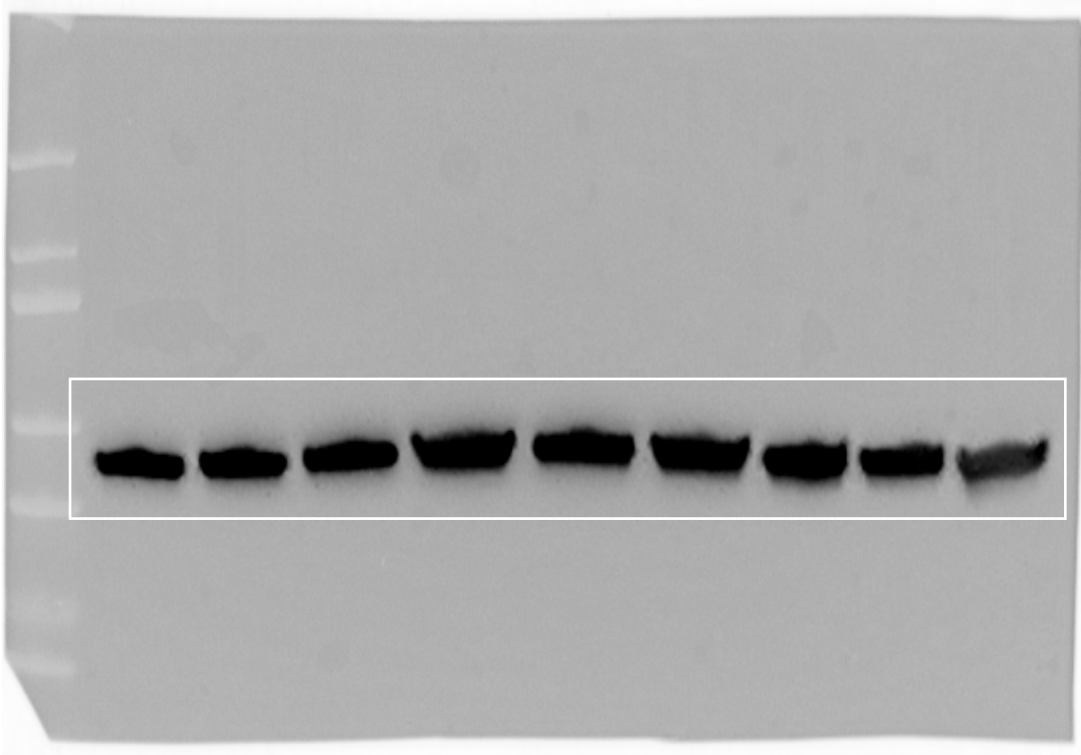

Actin
